# Supplementary material
Source: PubMed Central journal article supplement (PMC1224646)

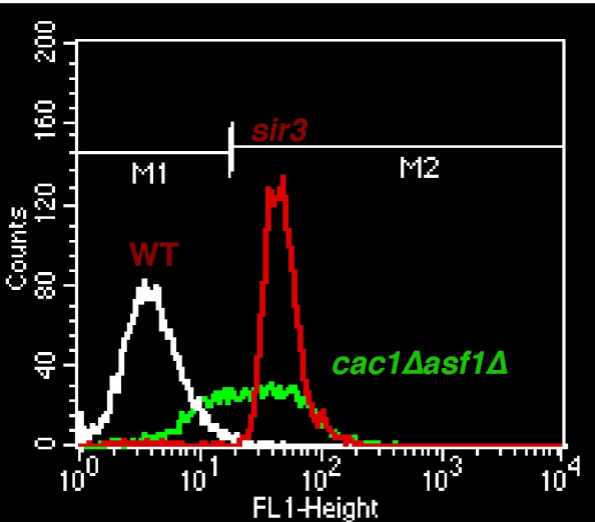

Supplement: pnas_0506176102_1.pdf [file pnas_0506176102_1.pdf]

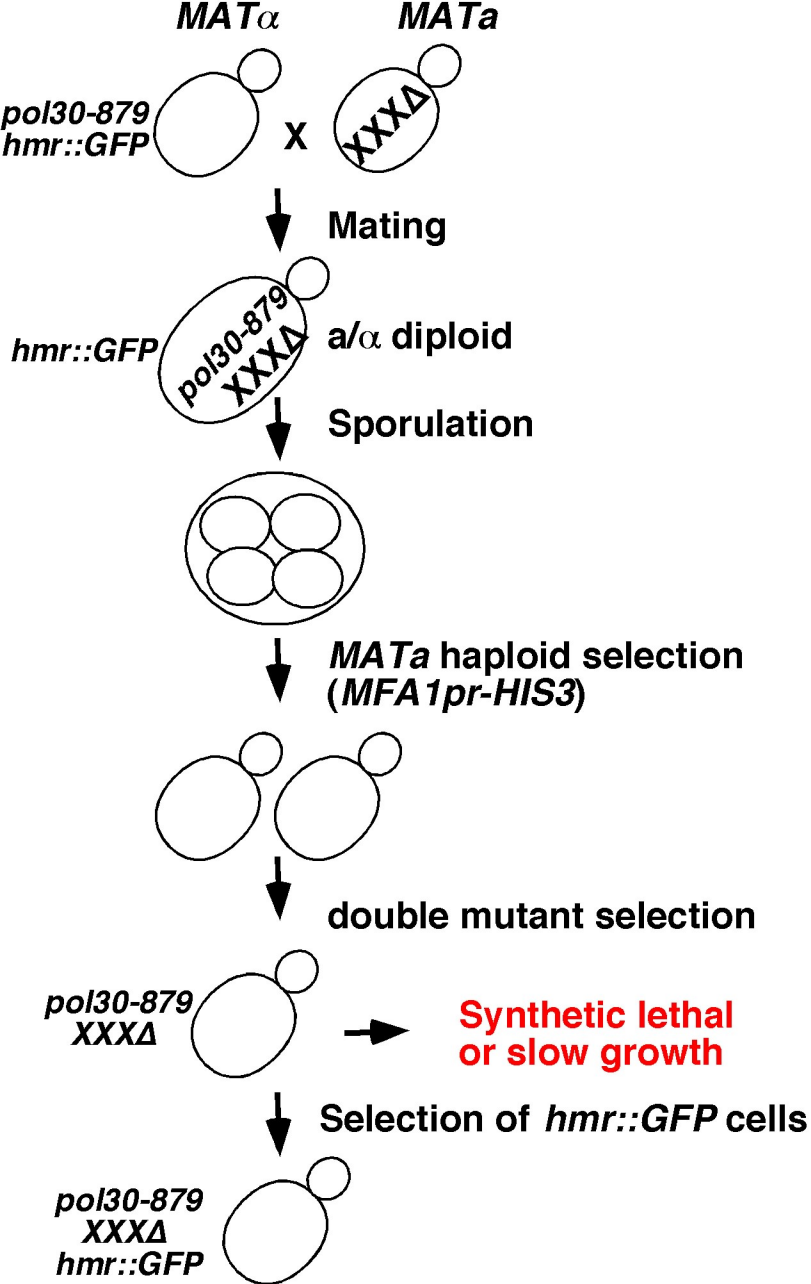

**Visualize GFP positive cells**  
(candidate mutants)

Supplement: pnas_0506176102_2.pdf [file pnas_0506176102_2.pdf]

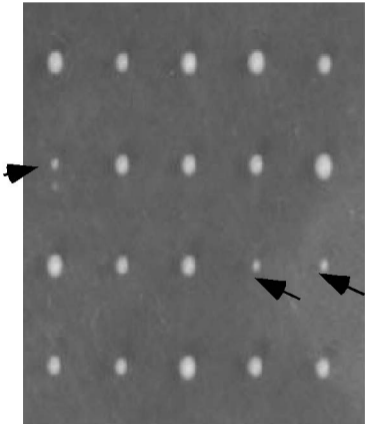

Supplement: pnas_0506176102_3.pdf [file pnas_0506176102_3.pdf]
